# Supplementary material
Source: PubMed Central journal article supplement (PMC3530940)
Supplement: Supp_Fig1.pdf [file Supp_Fig1.pdf]

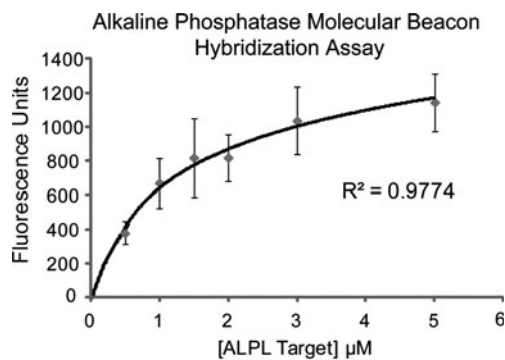

**SUPPLEMENTARY FIG. S1.** Molecular beacon hybridization efficiency was evaluated by exposing a 5  $\mu\text{M}$  concentration of ALPL beacon to stepwise increases in target sequence. As expected, at lower concentrations, fluorescence intensity increased rapidly, while at the highest concentration the binding was saturated ( $R^2=0.9774$ ). Beacon fluorescence increased steadily with target concentration, indicating that the beacon readily unfolds and binds to the target. The data suggest that at target concentrations higher than 5  $\mu\text{M}$ , a saturation of binding would occur. These concentrations are  $\sim 1 \times 10^8$  times higher than intracellular concentrations of upregulated mRNA.
