# Supplementary material
Source: PubMed Central journal article supplement (PMC3530940)
Supplement: Supp_Fig2.pdf [file Supp_Fig2.pdf]

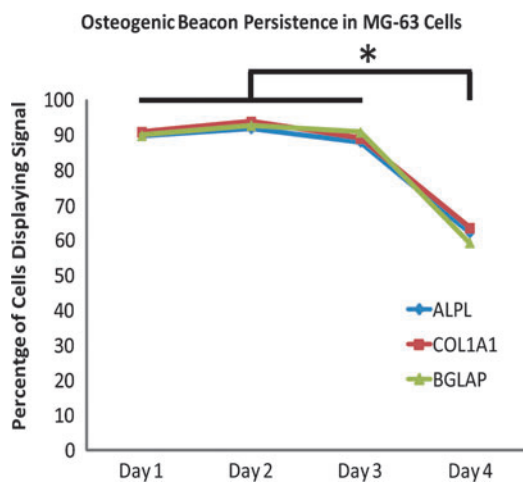

**SUPPLEMENTARY FIG. S2.** MG-63 osteosarcoma cells were treated with beacons corresponding to *ALPL*, *COL1A1*, and *BGLAP* and monitored daily for 4 days to assess persistence of the DNA molecular beacons in live cells. Beacon signal remained consistent for days 1–3 but decreased by >30% between days 3 and 4 ( $*p < 0.05$ ).
